# Supplementary material
Source: publisher figshare collection journal article supplement (https://acs.figshare.com/ndownloader/files/5127709)
Supplement: Supplementary file 1 [file 5127709]

# Redox-Active Antineoplastic Ruthenium Complexes with Indazole: Correlation of in Vitro Potency and Reduction Potential

*Michael A. Jakupec, Erwin Reisner, Anna Eichinger, Martina Pongratz, Vladimir B. Arion, Markus  
Galanski, Christian Hartinger and Bernhard K. Keppler\**

Institute of Inorganic Chemistry, University of Vienna, Waehringer Strasse 42, 1090 Vienna, Austria

[bernhard.keppler@univie.ac.at](mailto:bernhard.keppler@univie.ac.at)

## **Supporting Information:**

S2 Elemental Analyses

S3 Details of the crystal structures of **5**·2CH<sub>3</sub>OH and

**6**·2(CH<sub>3</sub>)<sub>2</sub>CO

## Elemental Analyses

| Compound                                                                          | Anal. calcd.<br>for                    | calcd. [%] |      |       |       | found [%] |      |       |       |
|-----------------------------------------------------------------------------------|----------------------------------------|------------|------|-------|-------|-----------|------|-------|-------|
|                                                                                   |                                        | C          | H    | N     | Cl    | C         | H    | N     | Cl    |
| Trisindazolium<br>[hexachlororuthenate(III)]                                      | $C_{21}H_{21}N_6Cl_6Ru$                | 37.58      | 3.15 | 12.52 | 31.69 | 37.30     | 3.34 | 12.55 | 31.65 |
| Bisindazolium<br>[pentachloro(1 <i>H</i> -indazole)ruthenate(III)]                | $C_{21}H_{20}N_6Cl_5Ru$                | 39.74      | 3.18 | 13.24 | 27.93 | 40.01     | 3.24 | 13.01 | 28.31 |
| Indazolium <i>trans</i> -<br>[tetrachlorobis(1 <i>H</i> -indazole)ruthenate(III)] | $C_{21}H_{19}N_6Cl_4Ru$                | 42.16      | 3.20 | 14.05 | 23.70 | 41.97     | 3.03 | 13.78 | 23.92 |
| <i>mer</i> -Trichlorotris(1 <i>H</i> -indazole)ruthenium(III)                     | $C_{21}H_{18}N_6Cl_3Ru \cdot 2C_4H_8O$ | 49.33      | 4.85 | 11.90 | 15.06 | 49.23     | 4.58 | 12.04 | 15.16 |
| <i>trans</i> -[Dichlorotetra(1 <i>H</i> -indazole)ruthenium(III)] chloride        | $C_{28}H_{24}N_8Cl_3Ru$                | 49.46      | 3.56 | 16.48 | 15.64 | 49.63     | 3.70 | 16.73 | 15.85 |
| <i>trans</i> -[Dichlorotetra(1 <i>H</i> -indazole)ruthenium(II)]                  | $C_{28}H_{24}N_8Cl_2Ru$                | 52.18      | 3.75 | 17.39 | 11.00 | 52.46     | 3.59 | 17.17 | 10.92 |

### Details of the crystal structures of **5·2CH<sub>3</sub>OH** and **6·2(CH<sub>3</sub>)<sub>2</sub>CO**

The crystal structure of **5·2CH<sub>3</sub>OH** consists of the cations *trans*-[Ru<sup>III</sup>Cl<sub>2</sub>(ind)<sub>4</sub>]<sup>+</sup>, Cl<sup>−</sup> anions and methanol solvent molecules. The Ru atom in **5·2CH<sub>3</sub>OH** is coordinated octahedrally by four indazole ligands in equatorial plane and two chloride ligands in axial positions. The Ru–N bond lengths are in the range 2.069(5)–2.071(3) Å, whereas Ru–Cl1 and Ru–Cl2 are significantly longer at 2.3285(9) and 2.3338(9) Å, correspondingly. A propeller-like arrangement of the *trans*-tetraindazole core, formed by a tilting of the indazole rings with respect to the RuN<sub>4</sub> plane to reduce the mutual repulsions, is characteristic for the cation in **5·2CH<sub>3</sub>OH**. All of the indazole rings are essentially planar. The pitch of the four indazole planes varies between 20.2 and 38.5°. The *trans*-coordinated indazole ligands are almost parallel to one another. The dihedral angle is small and does not exceed 5.6°. Interestingly, in two of them the N–N bonds are *trans*, while in the other two these bonds are *cis* to each other. Torsion angles in **5·2CH<sub>3</sub>OH** are as follows: Cl1–Ru–N1–C1 = −38.5(3)°; Cl1–Ru–N5–N6 = −33.3(3)°; Cl1–Ru–N7–N8 = −25.3(3)°; Cl1–Ru–N3–N4 = −20.2(3)°.

The unit cell of **6·2(CH<sub>3</sub>)<sub>2</sub>CO** contains two crystallographically independent complexes along with two molecules of acetone. Like in **5·2CH<sub>3</sub>OH**, the coordination geometry about Ru(II) is a distorted octahedron of four nitrogen atoms of the indazole ligands and two chlorides. While the Ru–N bond lengths (Ru1–N1 2.0640(13), Ru1–N3 2.0638(14), Ru2–N5 2.0668(15) and Ru2–N7 2.0535(14) Å) are only slightly shorter than those in **5·2CH<sub>3</sub>OH**, the Ru1–Cl1 at 2.4120(9) and Ru2–Cl2 at 2.4236(7) Å are noticeably longer. This can be attributed to the effect of the ruthenium oxidation state. The arrangement of the indazole ligands is also similar, tending to minimize steric crowding between them. The opposite *trans*-coordinated indazole ligands are nearly parallel to each other in both crystallographically independent molecules (the dihedral angles vary from 0.1 to 5.6°). The relevant torsion angles in **6·2(CH<sub>3</sub>)<sub>2</sub>CO** are as follows: Cl1–Ru–N1–N2 = 40.16(10)°; Cl1–Ru–N3–N4 = 26.28(9)°; Cl2–Ru2–N7–N8 = −20.66(10)°; Cl2–Ru2–N5–C15 = 3.01(12)°.

Thus, X-ray diffraction study has shown that the reduction of **5** is accompanied by a lengthening of the Ru–Cl bonds by 0.08–0.09 Å. This is presumably the consequence of the lowering of the positive charge of the central metal ion.
